# Supplementary material
Source: Springer Nature journal article supplement (https://www.springermedizin.de/resource/supplementary/12891_2010_1124_MOESM1_ESM.pdf/9507752)

**A**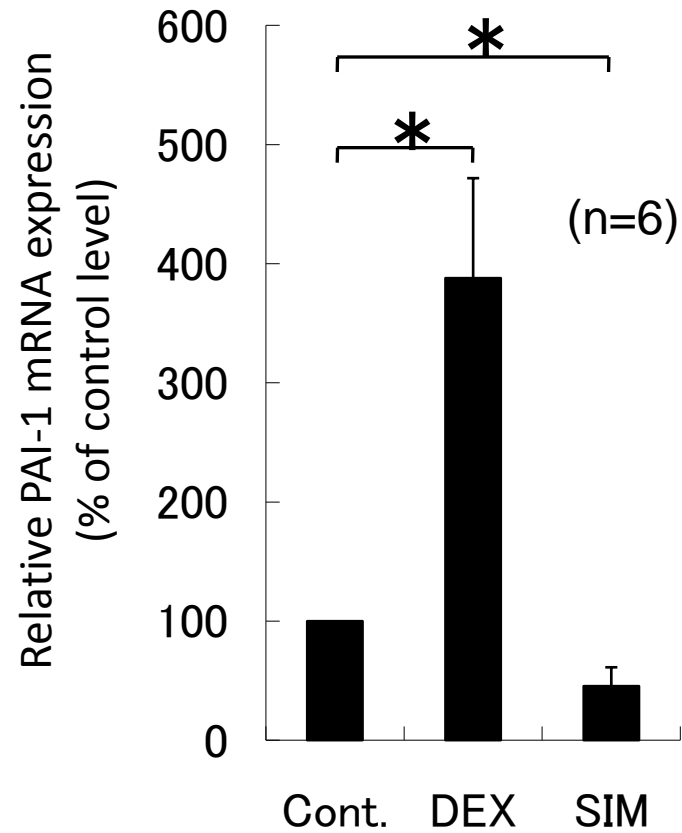**B**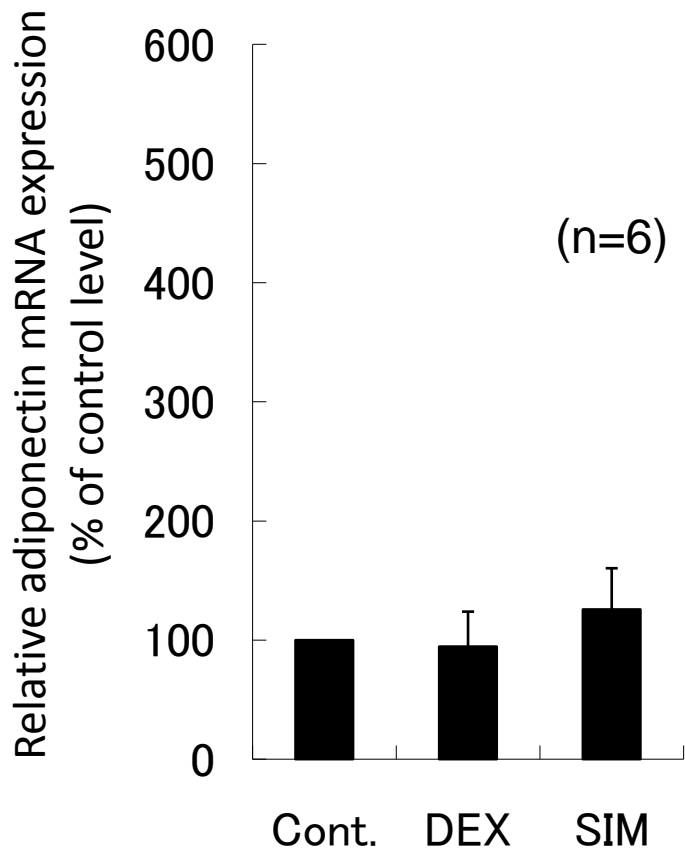

Supplement: MOESM1 [file 9507752]
